# Supplementary material for: Synthesis of isostructural porous metal-benzenedicarboxylates: Effect of metal ions on the kinetics of synthesis
Source: Royal Society of Chemistry journal article supplement (doi:10.1039/b927113a), 2010-01-01
Supplement: b927113a.pdf [file b927113a.pdf]

## Electronic Supplementary Information:

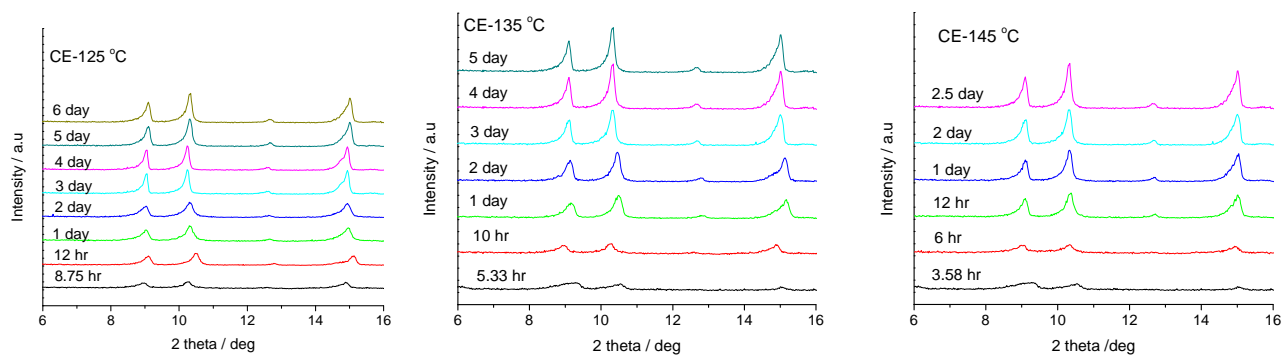

Figure S1. XRD pattern of as-synthesized MIL-47(V) at various temperatures and time under conventional electric heating.

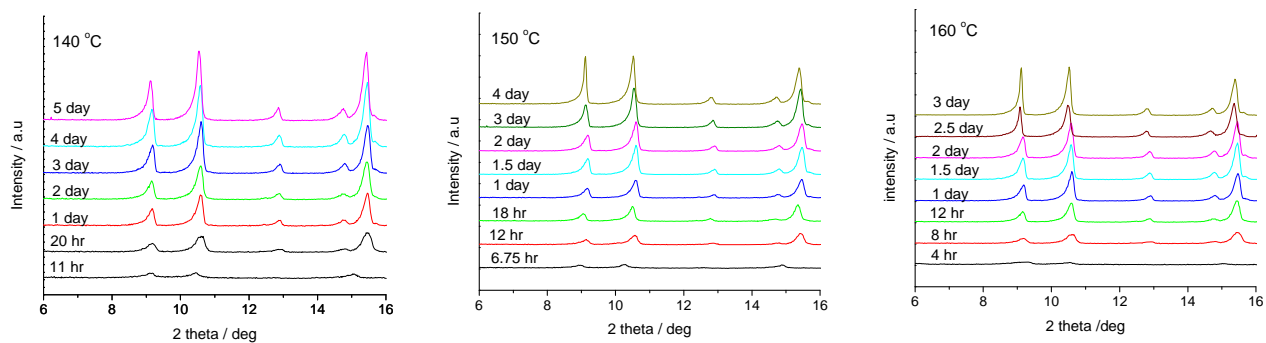

Figure S2. XRD pattern of as-synthesized MIL-53(Al) at various temperatures and time under conventional electric heating.

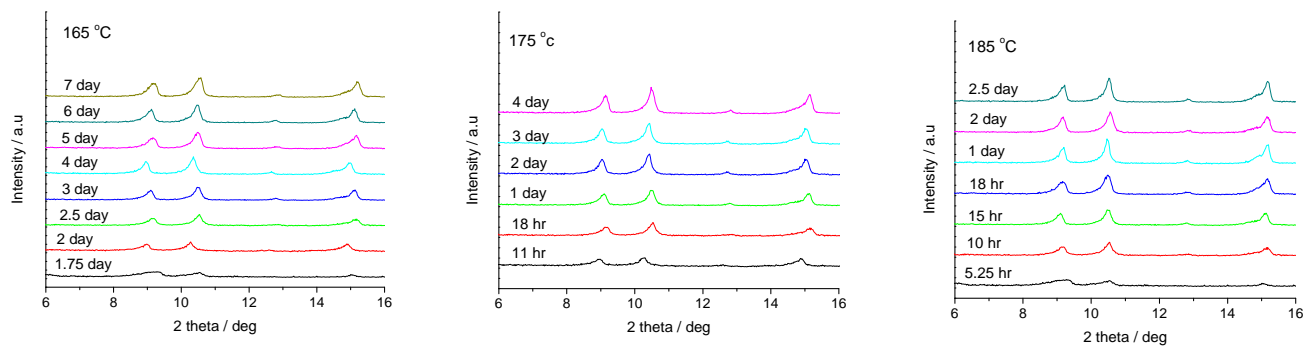

Figure S3. XRD pattern of as-synthesized MIL-53(Cr) at various temperatures and time under conventional electric heating.
